# Supplementary material
Source: HighWire-hosted journal article supplement (https://www.cmaj.ca/highwire/filestream/58477/field_highwire_adjunct_files/1/249-app1B.pdf)
Supplement: 249-app1B.pdf [file 249-app1B.pdf]

## Appendix 1B

### Procedure for removing enhanced respiratory and contact precautions

*Before leaving the patient's room, while still inside the room or in the anteroom (if there is one):*

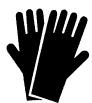

Remove **outer** gloves after patient contact. Discard into a waste container.

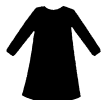

Remove gown by grasping at the neck and bringing it **forward** and off. Discard into a linen hamper or, if disposable, into a waste container.

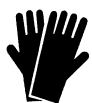

Remove **inner** pair of gloves.

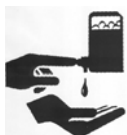

Sanitize hands with alcohol-based hand-sanitizer.

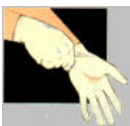

Don a clean pair of gloves.

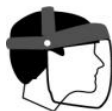

Remove face shield by bringing it **forward** off the face and discard into a waste container.

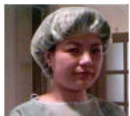

Remove hair cover carefully **from front to back**, and discard into a waste container.

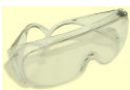

Remove goggles and place in a bag for cleaning.

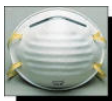

Remove mask: hold it in place while releasing the straps. Grasp the mask and pull it **forward**, away from the face. Discard into waste.

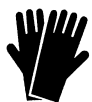

Remove gloves.

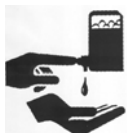

Decontaminate hands with alcohol hand-sanitizer.
